# Supplementary material for: Reconstructing long-term (1980–2022) daily ground particulate matter datasets in India (LongPMInd)
Source: Copernicus journal article supplement (doi:10.5194/essd-2024-34), 2024-02-06
Supplement: Supplementary file 1 [file essd-2024-34-supplement.pdf]

# Reconstructing long-term (1980-2022) daily ground particulate matter datasets in India (LongPMInd)

Shuai Wang<sup>1</sup>, Mengyuan Zhang<sup>1</sup>, Hui Zhao<sup>2</sup>, Peng Wang<sup>3,4</sup>, Sri Harsha Kota<sup>5</sup>, Qingyan Fu<sup>6</sup>, Cong Liu<sup>7</sup>, Hongliang Zhang<sup>1,4,8\*</sup>

<sup>1</sup>Department of Environmental Science and Engineering, Fudan University, Shanghai 200438, China

<sup>2</sup>School of Resources and Environmental Engineering, Jiangsu University of Technology, Changzhou 213001, China

<sup>3</sup>Department of Atmospheric and Oceanic Sciences, and Institute of Atmospheric Sciences, Fudan University, Shanghai, 200438, China

<sup>4</sup>IRDR ICoE on Risk Interconnectivity and Governance on Weather/Climate Extremes Impact and Public Health, Fudan University, Shanghai, China

<sup>5</sup>Department of Civil Engineering, Indian Institute of Technology, Delhi, 110016, India

<sup>6</sup>Shanghai Academy of Environmental Sciences, Shanghai 200003, China

<sup>7</sup>School of Public Health, Fudan University, Shanghai, 200032, China

<sup>8</sup>Institute of Eco-Chongming (IEC), Shanghai 200062, China

*Correspondence to:* Hongliang Zhang ([zhanghl@fudan.edu.cn](mailto:zhanghl@fudan.edu.cn))

Figure

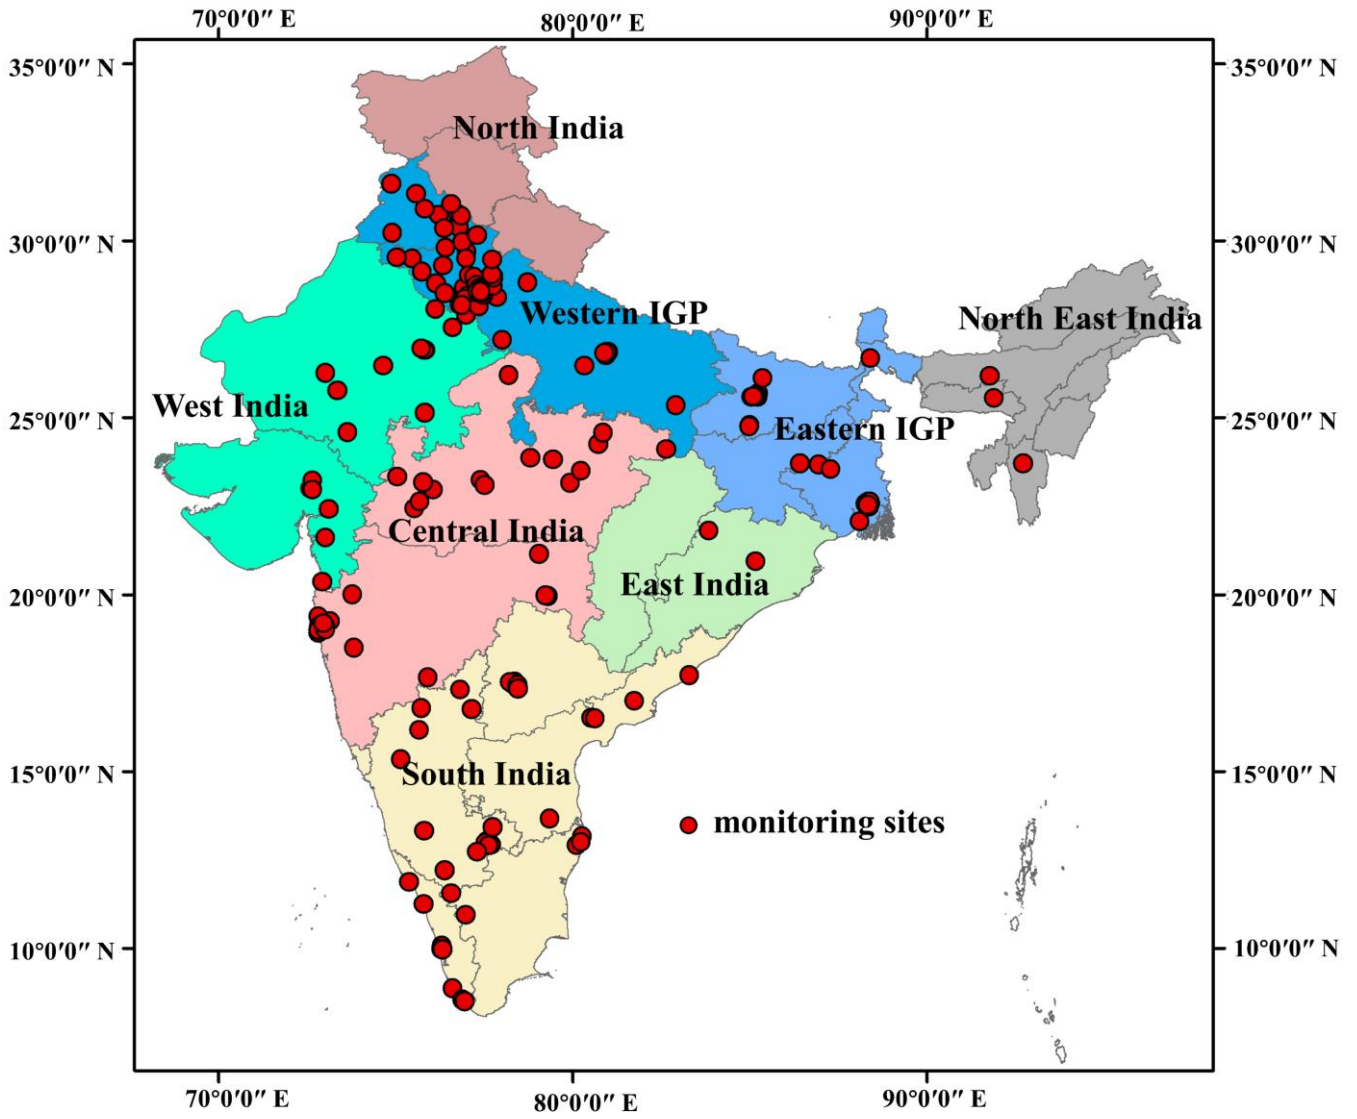

Figure S1: Research domain and location of monitoring sites in India.

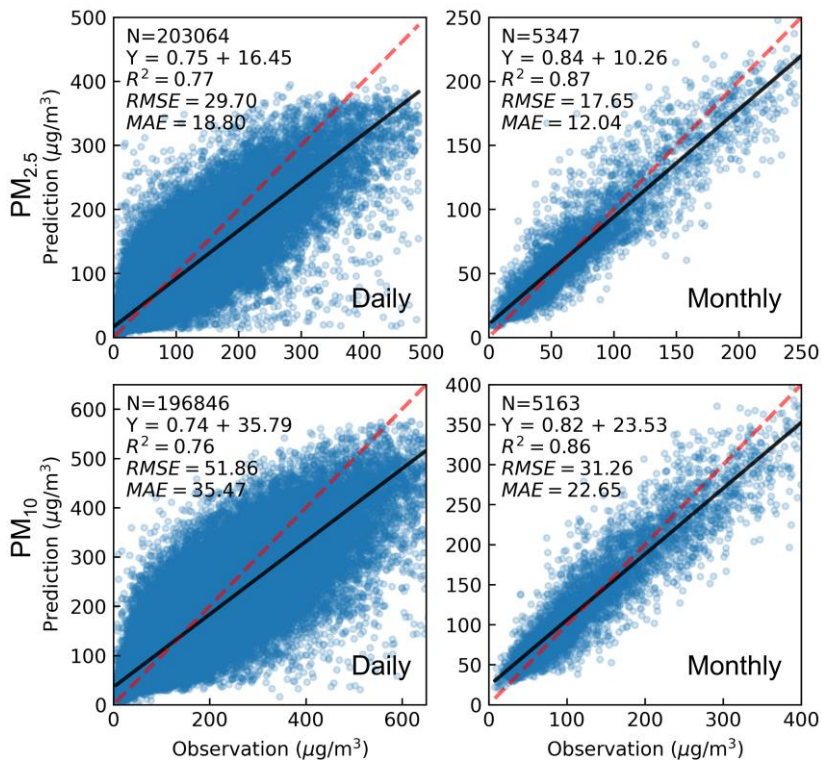

**Figure S2: Comparison between observations and predictions of out-of-sample CV for daily and monthly PM<sub>2.5</sub> and PM<sub>10</sub>. Dashed lines denote 1:1 line. Solid lines denote linear regression fitting. The sample numbers (N), linear regression function, R<sup>2</sup>, RMSE, and MAE are also shown. Units of RMSE and MAE are μg m<sup>-3</sup>.**

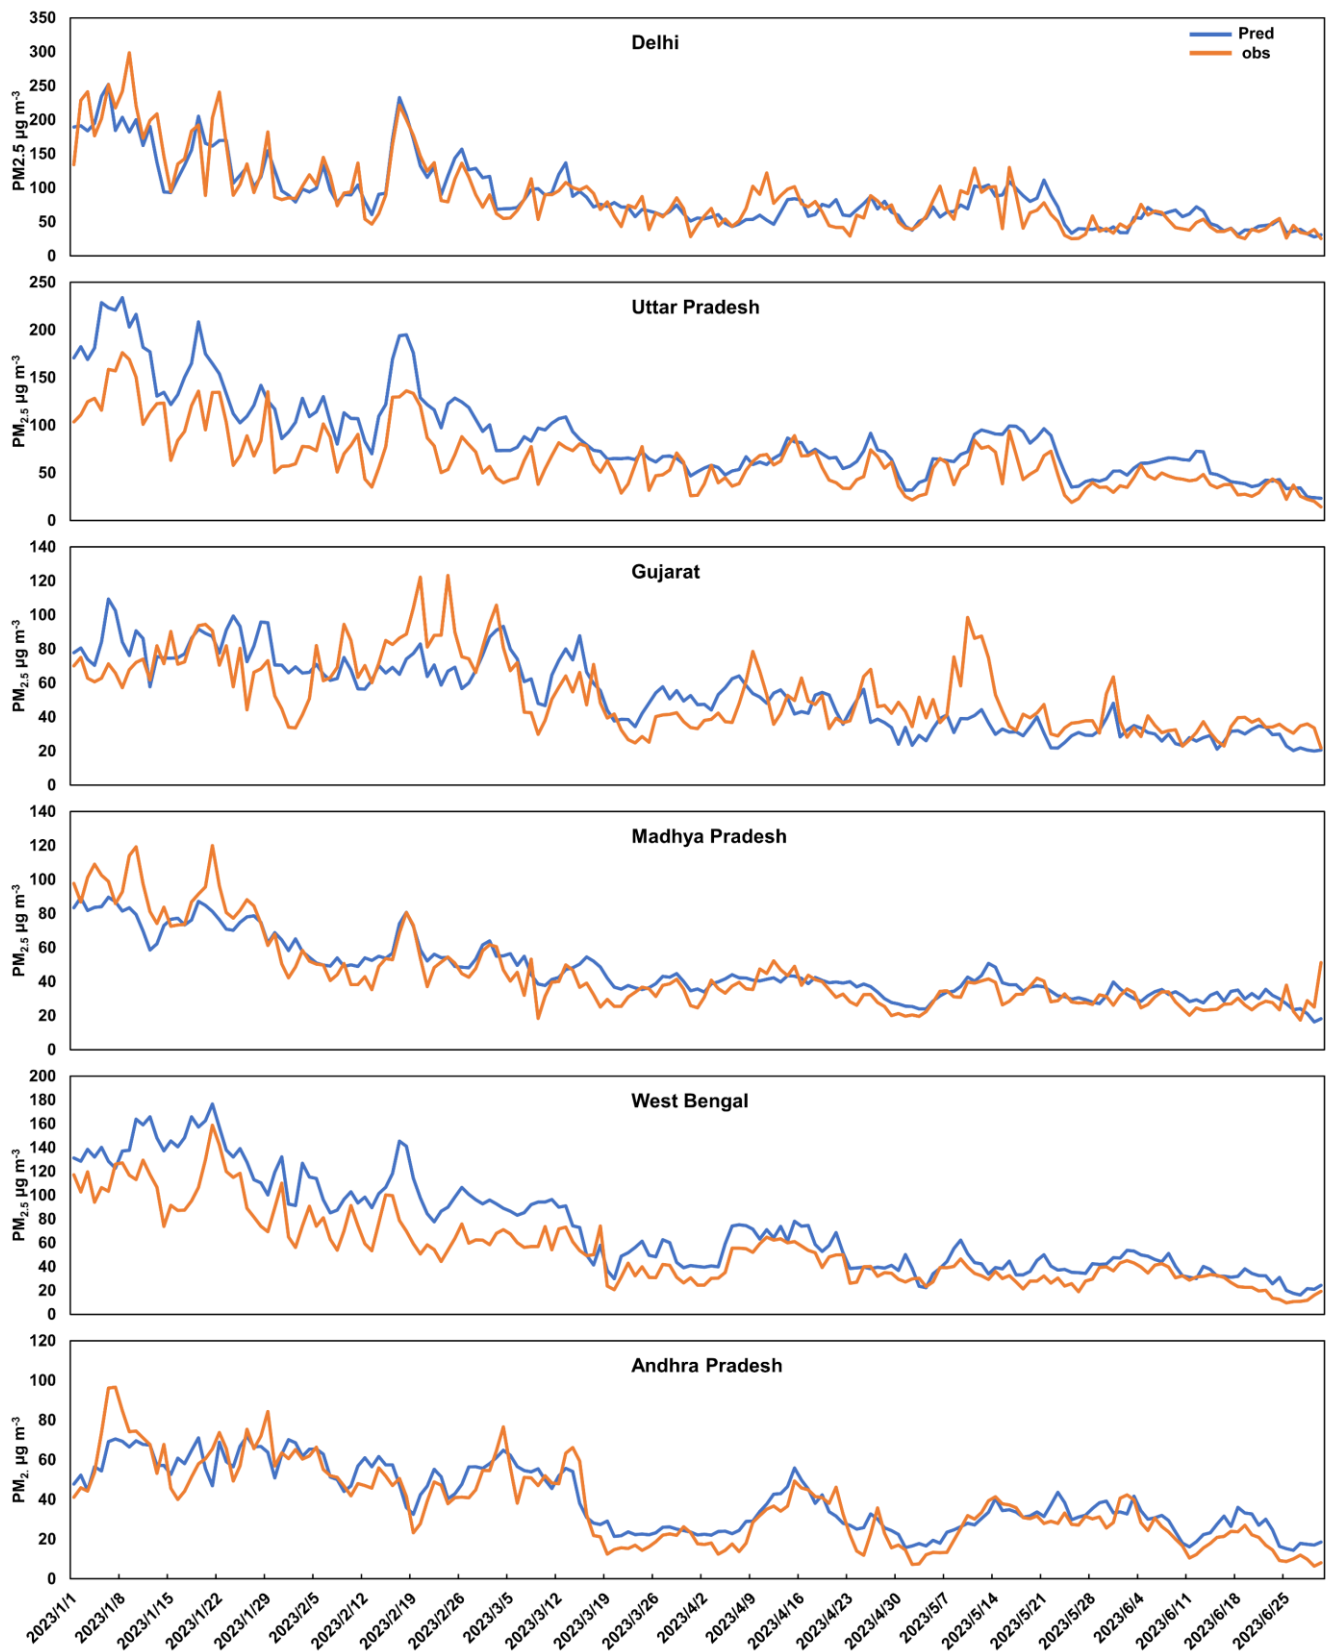

Figure S3: Comparison between observations and predictions of daily PM<sub>2.5</sub> for January - June in 2023.

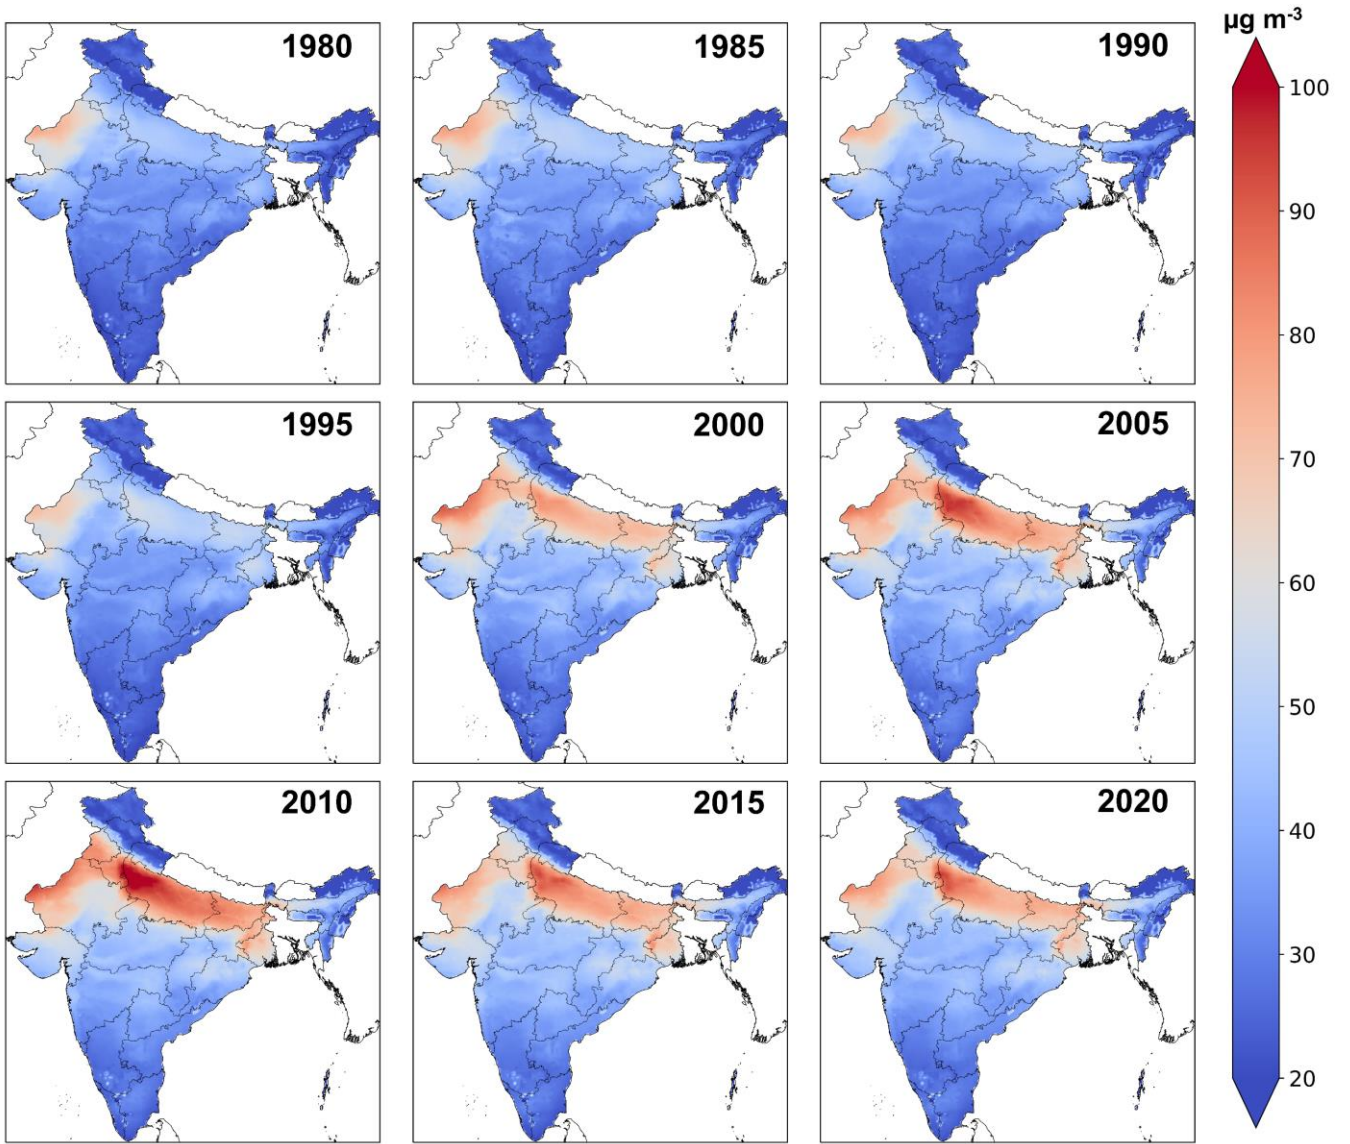

**Figure S4:** The spatial patterns of annual PM<sub>2.5</sub> in India during 1980-2022.



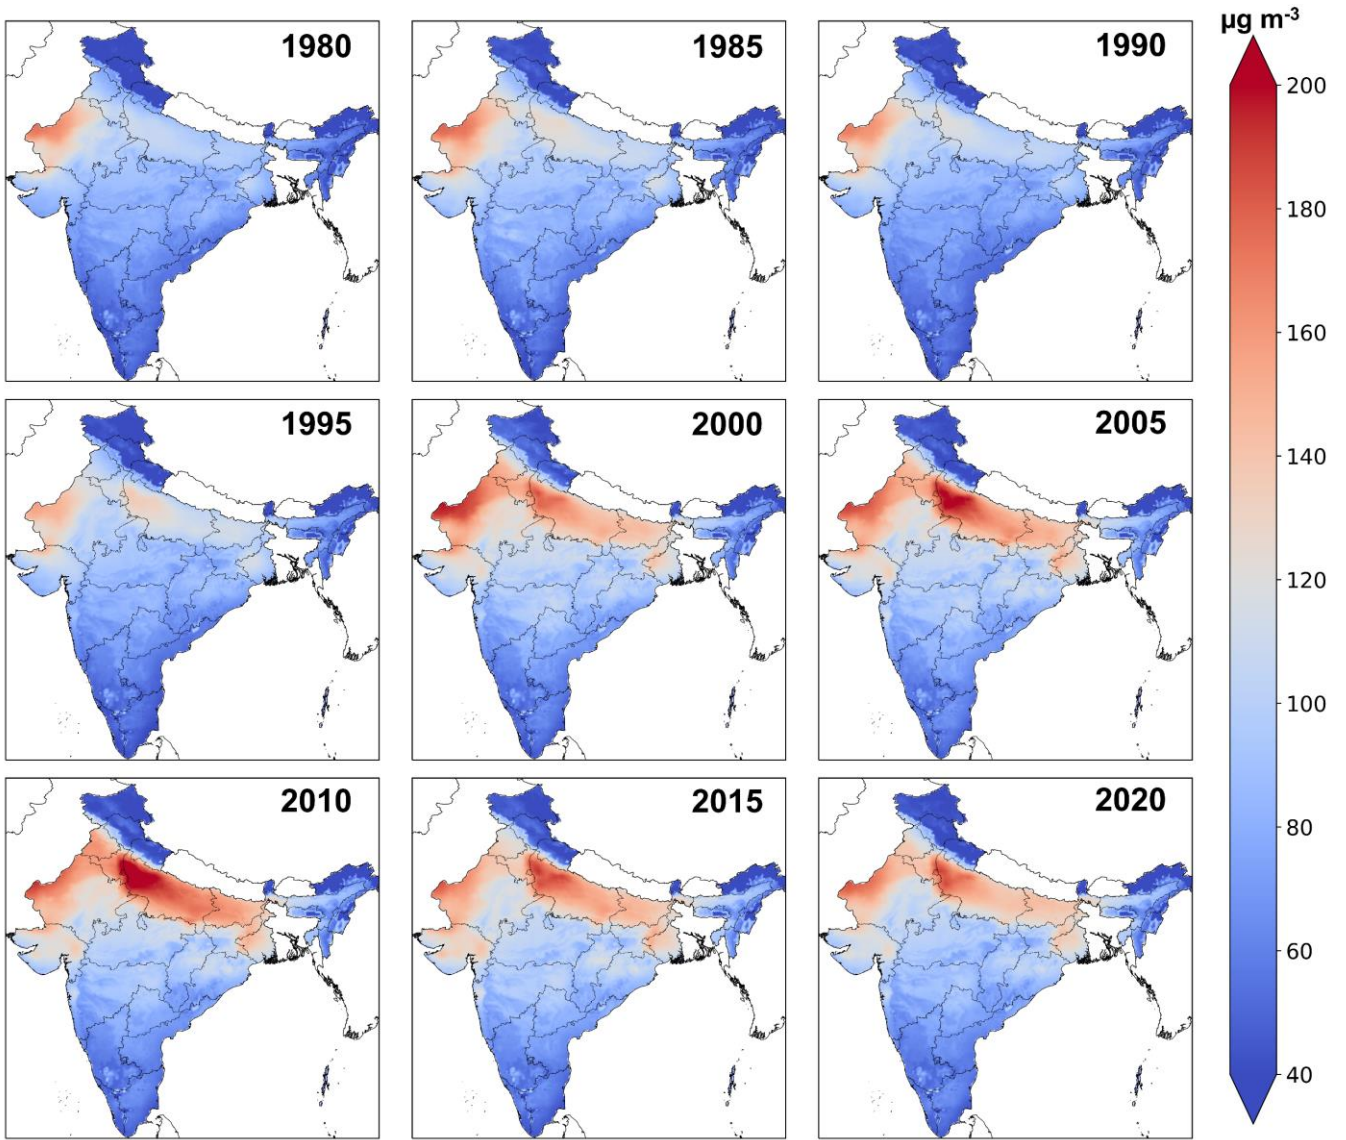

Figure S5: The spatial patterns of annual PM<sub>10</sub> in India during 1980-2022.

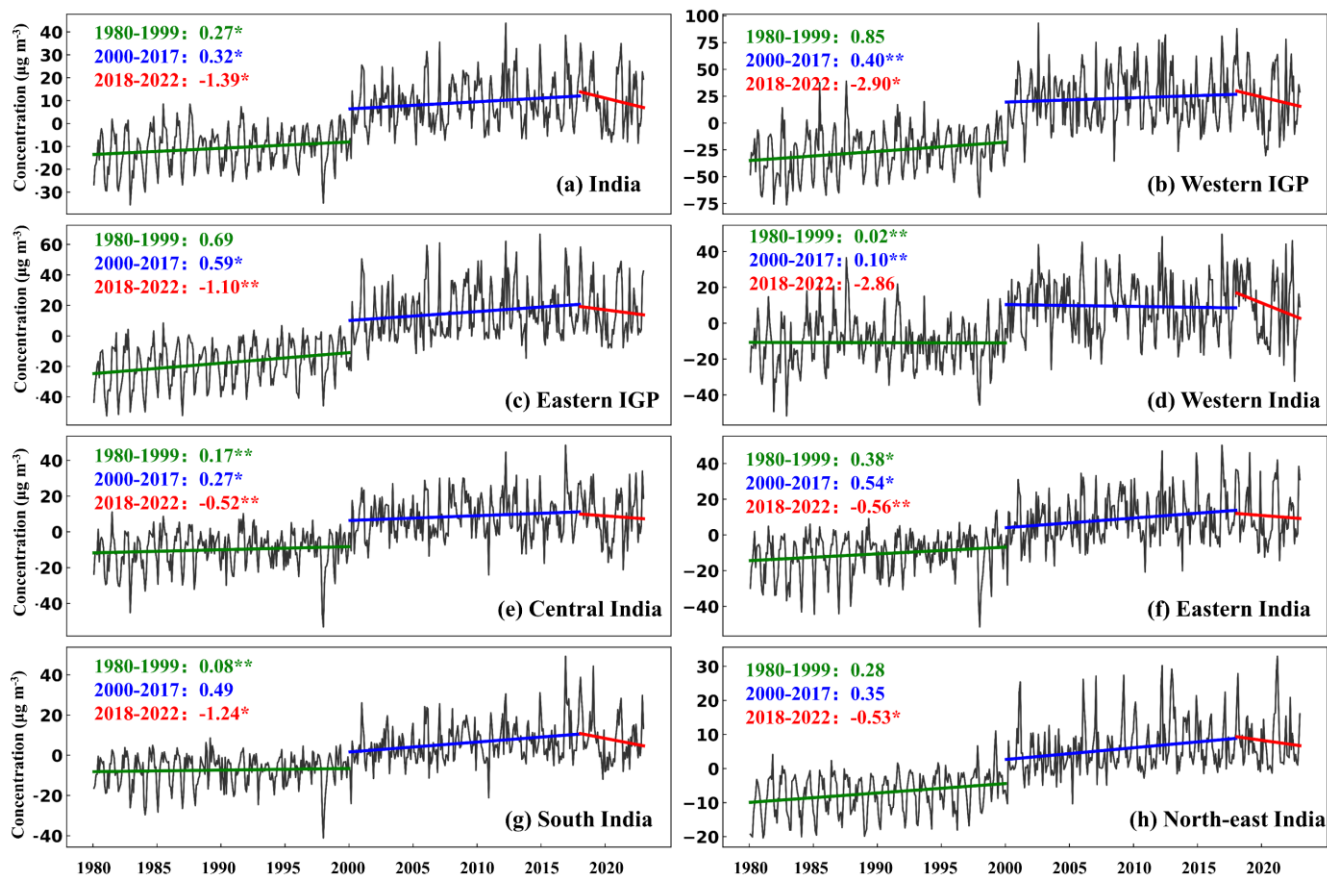

Figure S6: Time series of monthly PM<sub>10</sub> anomaly from 1980 to 2022 in India and typical regions. The colored straight lines are the linear regression trend (µg/m<sup>3</sup>/yr) for different period in China, and \* represent the significance of the trends (\*mean  $p < 0.05$  and \*\* mean  $p < 0.01$ ).

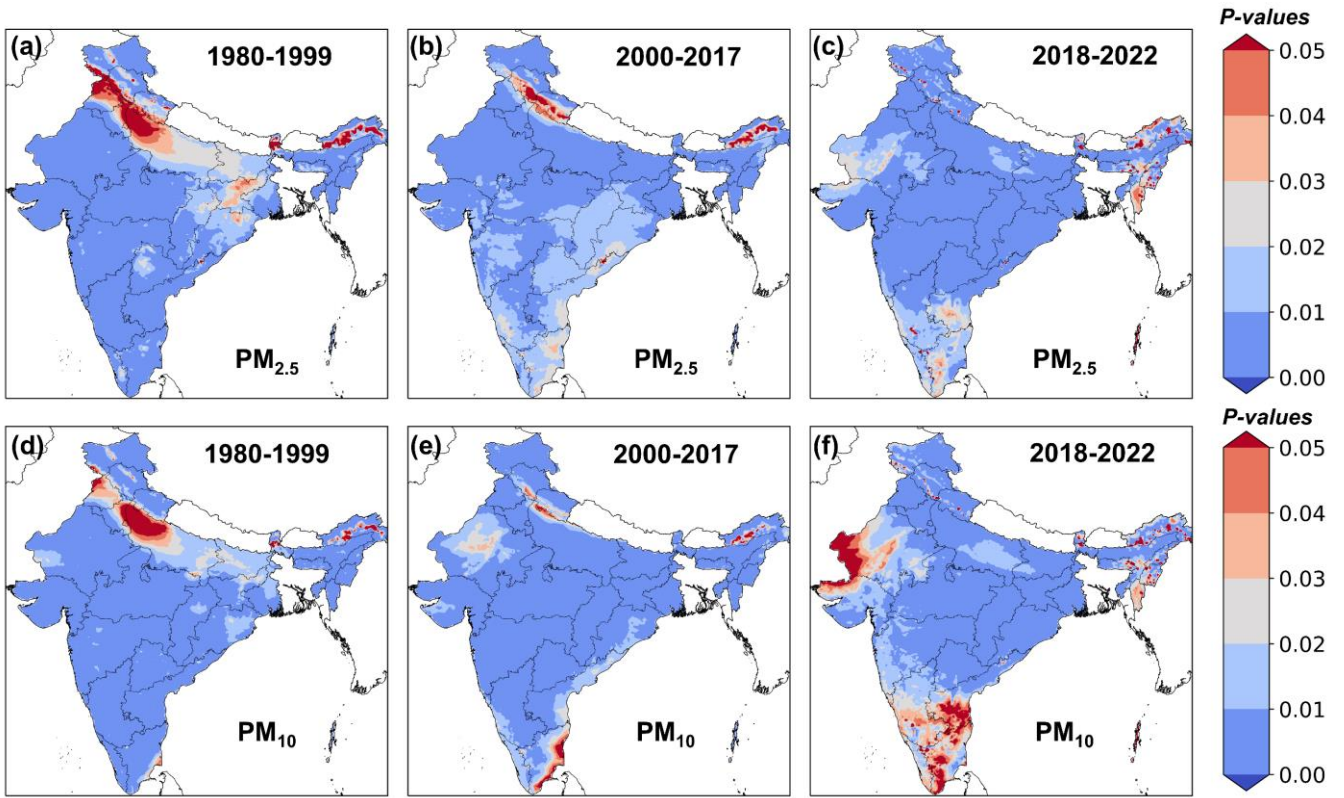

Figure S7: Spatial patterns of the significance of the trends for  $PM_{2.5}$  and  $PM_{10}$  ( $\mu\text{g}/\text{m}^3/\text{yr}$ ) during different period (1980-1999, 2000-2017, and 2018-2022).



**Table**

**Table S1: Daily PM<sub>2.5</sub> and PM<sub>10</sub> test results (not involved in training) for January - June in 2023. RSME and MAE unit: µg/m<sup>3</sup>.**

| Species           | Region         | R    | RMSE  | MAE   |
|-------------------|----------------|------|-------|-------|
| PM <sub>2.5</sub> | India          | 0.77 | 33.58 | 23.96 |
|                   | Delhi          | 0.90 | 24.04 | 17.15 |
|                   | Uttar Pradesh  | 0.91 | 32.72 | 25.67 |
|                   | Gujarat        | 0.69 | 16.95 | 13.06 |
|                   | Madhya Pradesh | 0.92 | 10.03 | 7.28  |
|                   | West Bengal    | 0.94 | 24.25 | 19.02 |
|                   | Andhra Pradesh | 0.92 | 8.34  | 6.71  |
| PM <sub>10</sub>  | India          | 0.72 | 64.25 | 46.69 |
|                   | Delhi          | 0.80 | 50.79 | 37.26 |
|                   | Uttar Pradesh  | 0.85 | 54.05 | 44.15 |
|                   | Gujarat        | 0.60 | 37.05 | 28.87 |
|                   | Madhya Pradesh | 0.88 | 19.31 | 14.40 |
|                   | West Bengal    | 0.94 | 40.42 | 33.08 |
|                   | Andhra Pradesh | 0.87 | 16.62 | 13.36 |

**Table S2: Uncertainty of estimated annual mortalities due to PM<sub>2.5</sub>-induced diseases for India and typical regions during 2000-2019.**

| year | cvd_ihd           | cvd_stroke        | lri               | neo_lung          | resp_copd         | t2_dm             | all               |
|------|-------------------|-------------------|-------------------|-------------------|-------------------|-------------------|-------------------|
| 2000 | 0.24 (0.22, 0.26) | 0.17 (0.15, 0.19) | 0.13 (0.12, 0.14) | 0.01 (0.01, 0.01) | 0.15 (0.12, 0.17) | 0.03 (0.02, 0.03) | 0.73 (0.65, 0.8)  |
| 2001 | 0.26 (0.23, 0.28) | 0.18 (0.16, 0.19) | 0.13 (0.12, 0.14) | 0.01 (0.01, 0.01) | 0.16 (0.13, 0.18) | 0.03 (0.02, 0.03) | 0.76 (0.68, 0.84) |
| 2002 | 0.27 (0.25, 0.29) | 0.18 (0.17, 0.2)  | 0.13 (0.12, 0.15) | 0.01 (0.01, 0.01) | 0.17 (0.14, 0.2)  | 0.03 (0.03, 0.03) | 0.8 (0.72, 0.88)  |
| 2003 | 0.26 (0.24, 0.29) | 0.18 (0.16, 0.2)  | 0.13 (0.11, 0.14) | 0.01 (0.01, 0.01) | 0.16 (0.14, 0.19) | 0.03 (0.03, 0.03) | 0.77 (0.69, 0.85) |
| 2004 | 0.26 (0.24, 0.28) | 0.17 (0.16, 0.19) | 0.12 (0.11, 0.14) | 0.01 (0.01, 0.01) | 0.16 (0.13, 0.18) | 0.03 (0.03, 0.03) | 0.75 (0.68, 0.83) |
| 2005 | 0.27 (0.25, 0.29) | 0.18 (0.16, 0.2)  | 0.12 (0.11, 0.14) | 0.01 (0.01, 0.01) | 0.17 (0.14, 0.19) | 0.03 (0.03, 0.03) | 0.78 (0.7, 0.87)  |
| 2006 | 0.29 (0.27, 0.31) | 0.19 (0.17, 0.2)  | 0.12 (0.11, 0.14) | 0.01 (0.01, 0.01) | 0.18 (0.15, 0.2)  | 0.03 (0.03, 0.04) | 0.82 (0.74, 0.9)  |
| 2007 | 0.31 (0.29, 0.34) | 0.2 (0.18, 0.21)  | 0.12 (0.11, 0.14) | 0.01 (0.01, 0.01) | 0.19 (0.16, 0.21) | 0.04 (0.03, 0.04) | 0.87 (0.78, 0.95) |
| 2008 | 0.34 (0.31, 0.37) | 0.21 (0.19, 0.23) | 0.13 (0.12, 0.14) | 0.01 (0.01, 0.02) | 0.21 (0.17, 0.24) | 0.04 (0.03, 0.04) | 0.94 (0.84, 1.03) |
| 2009 | 0.34 (0.31, 0.36) | 0.2 (0.19, 0.22)  | 0.12 (0.11, 0.13) | 0.01 (0.01, 0.02) | 0.2 (0.17, 0.22)  | 0.04 (0.03, 0.04) | 0.91 (0.82, 0.99) |
| 2010 | 0.35 (0.32, 0.37) | 0.2 (0.18, 0.22)  | 0.12 (0.11, 0.13) | 0.02 (0.01, 0.02) | 0.2 (0.16, 0.22)  | 0.04 (0.03, 0.04) | 0.91 (0.82, 1)    |
| 2011 | 0.37 (0.34, 0.4)  | 0.21 (0.19, 0.23) | 0.11 (0.1, 0.13)  | 0.02 (0.01, 0.02) | 0.2 (0.17, 0.23)  | 0.04 (0.04, 0.04) | 0.95 (0.85, 1.05) |
| 2012 | 0.39 (0.36, 0.42) | 0.22 (0.2, 0.24)  | 0.12 (0.11, 0.13) | 0.02 (0.02, 0.02) | 0.22 (0.18, 0.25) | 0.04 (0.04, 0.05) | 1.01 (0.91, 1.1)  |
| 2013 | 0.4 (0.37, 0.43)  | 0.22 (0.2, 0.24)  | 0.11 (0.1, 0.13)  | 0.02 (0.02, 0.02) | 0.23 (0.19, 0.25) | 0.05 (0.04, 0.05) | 1.03 (0.92, 1.12) |
| 2014 | 0.41 (0.38, 0.44) | 0.23 (0.21, 0.25) | 0.11 (0.1, 0.13)  | 0.02 (0.02, 0.02) | 0.24 (0.19, 0.27) | 0.05 (0.04, 0.05) | 1.06 (0.95, 1.16) |

|      |                   |                   |                   |                   |                   |                   |                   |
|------|-------------------|-------------------|-------------------|-------------------|-------------------|-------------------|-------------------|
| 2015 | 0.42 (0.38, 0.45) | 0.23 (0.21, 0.25) | 0.11 (0.1, 0.12)  | 0.02 (0.02, 0.02) | 0.24 (0.19, 0.27) | 0.05 (0.05, 0.05) | 1.06 (0.95, 1.17) |
| 2016 | 0.44 (0.4, 0.48)  | 0.25 (0.22, 0.27) | 0.11 (0.1, 0.12)  | 0.02 (0.02, 0.02) | 0.25 (0.2, 0.29)  | 0.05 (0.05, 0.06) | 1.12 (0.99, 1.24) |
| 2017 | 0.46 (0.42, 0.51) | 0.25 (0.23, 0.29) | 0.11 (0.1, 0.12)  | 0.02 (0.02, 0.02) | 0.26 (0.21, 0.3)  | 0.05 (0.05, 0.06) | 1.16 (1.01, 1.31) |
| 2018 | 0.48 (0.42, 0.55) | 0.27 (0.23, 0.31) | 0.11 (0.1, 0.13)  | 0.02 (0.02, 0.03) | 0.28 (0.22, 0.33) | 0.06 (0.05, 0.06) | 1.23 (1.05, 1.41) |
| 2019 | 0.49 (0.42, 0.56) | 0.27 (0.23, 0.31) | 0.11 (0.09, 0.12) | 0.02 (0.02, 0.03) | 0.28 (0.21, 0.33) | 0.06 (0.05, 0.07) | 1.22 (1.03, 1.41) |
| mean | 0.35 (0.32, 0.38) | 0.21 (0.19, 0.23) | 0.12 (0.11, 0.13) | 0.02 (0.01, 0.02) | 0.21 (0.17, 0.24) | 0.04 (0.04, 0.04) | 0.94 (0.84, 1.05) |

## Algorithm

---

### Algorithm 1. HyperparametersSelect

---

```

1: param_range = hyperparameters range
2: delta_rmse0 = 9999
3: rmse_test0 = 9999
4: model = lightGBM(param)
5: for param in param_range do
6:     model.train(train_x_data, train_y_data)
7:     rmse_train = rmse (model.predict(train_x_data), train_y_data)
8:     rmse_test = rmse (model.predict(test_x_data), test_y_data)
9:     delta_rmse = rmse_train - rmse_test
10:    if rmse_test0 / rmse_test > 1.01 then
11:        rmse_test0 = rmse_test
12:    else then
13:        return param
14:    if delta_rmse / delta_rmse0 < 1.05 then
15:        delta_rmse0 = delta_rmse
16:    else then
17:        return param
18: end for

```

---
